# Supplementary material for: Optimizing Return to Play After Anterior Cruciate Ligament Reconstruction in Soccer Players: an Evidence Based Approach
Source: Preprints.org preprint supplement (doi:10.20944/preprints202012.0447.v1), 2020-12-18
Supplement: Supplementary file 1 [file supplementary]

Author’s List

**Optimizing return to play after anterior cruciate ligament reconstruction in soccer players: an evidence based approach**

*Florian FORELLI1,2, Clément SANSONNET1, Steve CHIAPOLINI3, Jean MAZEAS1,2, Amaury VANDERBROUCK4, Pascal DUFFIET4, Louis RATTE4, Maude TRAULLÉ1,2.*

1 Physical Therapist, OrthoSport Rehab Center, Domont, France

2 Researcher, OrthoLab, Departement of Movement Analysis, Functional Exploration and Clinical Research, Domont, France

3 Physical Therapist, Franconville, France

4 Knee Orthopaedic Surgeon, Clinic of Domont, France

Corresponding Author: Florian FORELLI, Orthosport Rehab Center, 6 rue Descartes 95330 Domont, France, [fforelli@capio.fr](mailto:fforelli@capio.fr), +33769495275.
